# Supplementary material for: Mutual Influence of Human Cytochrome P450 Enzymes and UDP-Glucuronosyltransferases on Their Respective Activities in Recombinant Fission Yeast
Source: MDPI journal article supplement (doi:10.3390/biomedicines11020281), 2023-01-19
Supplement: s1 [file s1]

# Supplemental Information

**Table S1.** Strains used in this study.

| Serial number   | Strain name | Parental strain(s) | Genotype                                          | Expressed protein(s) | Reference  |
|-----------------|-------------|--------------------|---------------------------------------------------|----------------------|------------|
| <b>Haploids</b> |             |                    |                                                   |                      |            |
| 1               | JMN11       | None               | h+ ade6-M210 ura4-D18 his3.Δ1                     | None                 | This study |
| 2               | JMN12       | None               | h- ade6-M216 ura4-D18 his3.Δ1                     | None                 | This study |
| 3               | SAN1        | JMN11              | h+ ade6-M210 ura4-D18 his3.Δ1 leu1::pCAD1         | None                 | This study |
| 4               | SAN2        | JMN11              | h+ ade6-M210 ura4-D18 his3.Δ1 leu1::pCAD1-CPR     | CPR                  | This study |
| 5               | SAN3        | JMN12              | h- ade6-M216 ura4-D18 his3.Δ1 leu1::pCAD1         | None                 | This study |
| 6               | SAN4        | JMN12              | h- ade6-M216 ura4-D18 his3.Δ1 leu1::pCAD1-UGT1A1  | UGT1A1               | This study |
| 7               | SAN5        | JMN12              | h- ade6-M216 ura4-D18 his3.Δ1 leu1::pCAD1-UGT1A3  | UGT1A3               | This study |
| 8               | SAN6        | JMN12              | h- ade6-M216 ura4-D18 his3.Δ1 leu1::pCAD1-UGT1A4  | UGT1A4               | This study |
| 9               | SAN7        | JMN12              | h- ade6-M216 ura4-D18 his3.Δ1 leu1::pCAD1-UGT1A5  | UGT1A5               | This study |
| 10              | SAN8        | JMN12              | h- ade6-M216 ura4-D18 his3.Δ1 leu1::pCAD1-UGT1A6  | UGT1A6               | This study |
| 11              | SAN9        | JMN12              | h- ade6-M216 ura4-D18 his3.Δ1 leu1::pCAD1-UGT1A7  | UGT1A7               | This study |
| 12              | SAN10       | JMN12              | h- ade6-M216 ura4-D18 his3.Δ1 leu1::pCAD1-UGT1A8  | UGT1A8               | This study |
| 13              | SAN11       | JMN12              | h- ade6-M216 ura4-D18 his3.Δ1 leu1::pCAD1-UGT1A9  | UGT1A9               | This study |
| 14              | SAN12       | JMN12              | h- ade6-M216 ura4-D18 his3.Δ1 leu1::pCAD1-UGT1A10 | UGT1A10              | This study |
| 15              | SAN13       | JMN12              | h- ade6-M216 ura4-D18 his3.Δ1 leu1::pCAD1-UGT2A1  | UGT2A1               | This study |
| 16              | SAN14       | JMN12              | h- ade6-M216 ura4-D18 his3.Δ1 leu1::pCAD1-UGT2A2  | UGT2A2               | This study |
| 17              | SAN15       | JMN12              | h- ade6-M216 ura4-D18 his3.Δ1 leu1::pCAD1-UGT2A3  | UGT2A3               | This study |
| 18              | SAN16       | JMN12              | h- ade6-M216 ura4-D18 his3.Δ1 leu1::pCAD1-UGT2B4  | UGT2B4               | This study |
| 19              | SAN17       | JMN12              | h- ade6-M216 ura4-D18 his3.Δ1 leu1::pCAD1-UGT2B7  | UGT2B7               | This study |
| 20              | SAN18       | JMN12              | h- ade6-M216 ura4-D18 his3.Δ1 leu1::pCAD1-UGT2B10 | UGT2B10              | This study |
| 21              | SAN19       | JMN12              | h- ade6-M216 ura4-D18 his3.Δ1 leu1::pCAD1-UGT2B11 | UGT2B11              | This study |
| 22              | SAN20       | JMN12              | h- ade6-M216 ura4-D18 his3.Δ1 leu1::pCAD1-UGT2B15 | UGT2B15              | This study |

|                                   |        |             |                                                                                                 |              |            |
|-----------------------------------|--------|-------------|-------------------------------------------------------------------------------------------------|--------------|------------|
| 23                                | SAN21  | JMN12       | h- ade6-M216 ura4-D18 his3.Δ1 leu1::pCAD1-UGT2B17                                               | UGT2B17      | This study |
| 24                                | SAN22  | JMN12       | h- ade6-M216 ura4-D18 his3.Δ1 leu1::pCAD1-UGT2B28                                               | UGT2B28      | This study |
| <b>Diploids with CPR and UGTs</b> |        |             |                                                                                                 |              |            |
| 25                                | SAN100 | SAN2, SAN3  | h+/h- ade6-M210/ade6-M216 ura4-D18/ura4-D18 his3.Δ1/his3.Δ1 leu1::pCAD1-CPR/leu1::pCAD1         | CPR          | This study |
| 26                                | SAN101 | SAN2, SAN4  | h+/h- ade6-M210/ade6-M216 ura4-D18/ura4-D18 his3.Δ1/his3.Δ1 leu1::pCAD1-CPR/leu1::pCAD1-UGT1A1  | CPR, UGT1A1  | This study |
| 27                                | SAN102 | SAN2, SAN5  | h+/h- ade6-M210/ade6-M216 ura4-D18/ura4-D18 his3.Δ1/his3.Δ1 leu1::pCAD1-CPR/leu1::pCAD1-UGT1A3  | CPR, UGT1A3  | This study |
| 28                                | SAN103 | SAN2, SAN6  | h+/h- ade6-M210/ade6-M216 ura4-D18/ura4-D18 his3.Δ1/his3.Δ1 leu1::pCAD1-CPR/leu1::pCAD1-UGT1A4  | CPR, UGT1A4  | This study |
| 29                                | SAN104 | SAN2, SAN7  | h+/h- ade6-M210/ade6-M216 ura4-D18/ura4-D18 his3.Δ1/his3.Δ1 leu1::pCAD1-CPR/leu1::pCAD1-UGT1A5  | CPR, UGT1A5  | This study |
| 30                                | SAN105 | SAN2, SAN8  | h+/h- ade6-M210/ade6-M216 ura4-D18/ura4-D18 his3.Δ1/his3.Δ1 leu1::pCAD1-CPR/leu1::pCAD1-UGT1A6  | CPR, UGT1A6  | This study |
| 31                                | SAN106 | SAN2, SAN9  | h+/h- ade6-M210/ade6-M216 ura4-D18/ura4-D18 his3.Δ1/his3.Δ1 leu1::pCAD1-CPR/leu1::pCAD1-UGT1A7  | CPR, UGT1A7  | This study |
| 32                                | SAN107 | SAN2, SAN10 | h+/h- ade6-M210/ade6-M216 ura4-D18/ura4-D18 his3.Δ1/his3.Δ1 leu1::pCAD1-CPR/leu1::pCAD1-UGT1A8  | CPR, UGT1A8  | This study |
| 33                                | SAN108 | SAN2, SAN11 | h+/h- ade6-M210/ade6-M216 ura4-D18/ura4-D18 his3.Δ1/his3.Δ1 leu1::pCAD1-CPR/leu1::pCAD1-UGT1A9  | CPR, UGT1A9  | This study |
| 34                                | SAN109 | SAN2, SAN12 | h+/h- ade6-M210/ade6-M216 ura4-D18/ura4-D18 his3.Δ1/his3.Δ1 leu1::pCAD1-CPR/leu1::pCAD1-UGT1A10 | CPR, UGT1A10 | This study |
| 35                                | SAN110 | SAN2, SAN13 | h+/h- ade6-M210/ade6-M216 ura4-D18/ura4-D18 his3.Δ1/his3.Δ1 leu1::pCAD1-CPR/leu1::pCAD1-UGT2A1  | CPR, UGT2A1  | This study |
| 36                                | SAN111 | SAN2, SAN14 | h+/h- ade6-M210/ade6-M216 ura4-D18/ura4-D18 his3.Δ1/his3.Δ1 leu1::pCAD1-CPR/leu1::pCAD1-UGT2A2  | CPR, UGT2A2  | This study |
| 37                                | SAN112 | SAN2, SAN15 | h+/h- ade6-M210/ade6-M216 ura4-D18/ura4-D18 his3.Δ1/his3.Δ1 leu1::pCAD1-CPR/leu1::pCAD1-UGT2A3  | CPR, UGT2A3  | This study |
| 38                                | SAN113 | SAN2, SAN16 | h+/h- ade6-M210/ade6-M216 ura4-D18/ura4-D18 his3.Δ1/his3.Δ1 leu1::pCAD1-CPR/leu1::pCAD1-UGT2B4  | CPR, UGT2B4  | This study |
| 39                                | SAN114 | SAN2, SAN17 | h+/h- ade6-M210/ade6-M216 ura4-D18/ura4-D18 his3.Δ1/his3.Δ1 leu1::pCAD1-CPR/leu1::pCAD1-UGT2B7  | CPR, UGT2B7  | This study |

|                             |        |             |                                                                                                             |                     |            |
|-----------------------------|--------|-------------|-------------------------------------------------------------------------------------------------------------|---------------------|------------|
| 40                          | SAN115 | SAN2, SAN18 | h+/h- ade6-M210/ade6-M216 ura4-D18/ura4-D18 his3.Δ1/his3.Δ1 leu1::pCAD1-CPR/leu1::pCAD1-UGT2B10             | CPR, UGT2B10        | This study |
| 41                          | SAN116 | SAN2, SAN19 | h+/h- ade6-M210/ade6-M216 ura4-D18/ura4-D18 his3.Δ1/his3.Δ1 leu1::pCAD1-CPR/leu1::pCAD1-UGT2B11             | CPR, UGT2B11        | This study |
| 42                          | SAN117 | SAN2, SAN20 | h+/h- ade6-M210/ade6-M216 ura4-D18/ura4-D18 his3.Δ1/his3.Δ1 leu1::pCAD1-CPR/leu1::pCAD1-UGT2B15             | CPR, UGT2B15        | This study |
| 43                          | SAN118 | SAN2, SAN21 | h+/h- ade6-M210/ade6-M216 ura4-D18/ura4-D18 his3.Δ1/his3.Δ1 leu1::pCAD1-CPR/leu1::pCAD1-UGT2B17             | CPR, UGT2B17        | This study |
| 44                          | SAN119 | SAN2, SAN22 | h+/h- ade6-M210/ade6-M216 ura4-D18/ura4-D18 his3.Δ1/his3.Δ1 leu1::pCAD1-CPR/leu1::pCAD1-UGT2B28             | CPR, UGT2B28        | This study |
| <b>Diploids with UGTs</b>   |        |             |                                                                                                             |                     |            |
| 45                          | SAN120 | SAN1, SAN3  | h+/h- ade6-M210/ade6-M216 ura4-D18/ura4-D18 his3.Δ1/his3.Δ1 leu1::pCAD1/leu1::pCAD1                         | None                | This Study |
| 46                          | SAN123 | SAN2, SAN6  | h+/h- ade6-M210/ade6-M216 ura4-D18/ura4-D18 his3.Δ1/his3.Δ1 leu1::pCAD1/leu1::pCAD1-UGT1A4                  | UGT1A4              | This study |
| 47                          | SAN128 | SAN2, SAN11 | h+/h- ade6-M210/ade6-M216 ura4-D18/ura4-D18 his3.Δ1/his3.Δ1 leu1::pCAD1/leu1::pCAD1-UGT1A9                  | UGT1A9              | This study |
| 48                          | SAN132 | SAN2, SAN15 | h+/h- ade6-M210/ade6-M216 ura4-D18/ura4-D18 his3.Δ1/his3.Δ1 leu1::pCAD1/leu1::pCAD1-UGT2A3                  | UGT2A3              | This study |
| 49                          | SAN134 | SAN1, SAN17 | h+/h- ade6-M210/ade6-M216 ura4-D18/ura4-D18 his3.Δ1/his3.Δ1 leu1::pCAD1/leu1::pCAD1-UGT2B7                  | UGT2B7              | This study |
| 50                          | SAN139 | SAN2, SAN22 | h+/h- ade6-M210/ade6-M216 ura4-D18/ura4-D18 his3.Δ1/his3.Δ1 leu1::pCAD1/leu1::pCAD1-UGT2B28                 | UGT2B28             | This study |
| <b>Diploids with CYP2C9</b> |        |             |                                                                                                             |                     |            |
| 51                          | SAN200 | SAN100      | h+/h- ade6-M210/ade6-M216 ura4-D18/ura4-D18 his3.Δ1/his3.Δ1 leu1::pCAD1-CPR/leu1::pCAD1/pREP1-CYP2C9        | CPR, CYP2C9         | This study |
| 52                          | SAN201 | SAN101      | h+/h- ade6-M210/ade6-M216 ura4-D18/ura4-D18 his3.Δ1/his3.Δ1 leu1::pCAD1-CPR/leu1::pCAD1-UGT1A1              | CPR, UGT1A1, CYP2C9 | This study |
| 53                          | SAN202 | SAN102      | h+/h- ade6-M210/ade6-M216 ura4-D18/ura4-D18 his3.Δ1/his3.Δ1 leu1::pCAD1-CPR/leu1::pCAD1-UGT1A3/pREP1-CYP2C9 | CPR, UGT1A3, CYP2C9 | This study |
| 54                          | SAN203 | SAN103      | h+/h- ade6-M210/ade6-M216 ura4-D18/ura4-D18 his3.Δ1/his3.Δ1 leu1::pCAD1-CPR/leu1::pCAD1-UGT1A4/pREP1-CYP2C9 | CPR, UGT1A4, CYP2C9 | This study |

|    |        |        |                                                                                                              |                      |            |
|----|--------|--------|--------------------------------------------------------------------------------------------------------------|----------------------|------------|
| 55 | SAN204 | SAN104 | h+/h- ade6-M210/ade6-M216 ura4-D18/ura4-D18 his3.Δ1/his3.Δ1 leu1::pCAD1-CPR/leu1::pCAD1-UGT1A5/pREP1-CYP2C9  | CPR, UGT1A5, CYP2C9  | This study |
| 56 | SAN205 | SAN105 | h+/h- ade6-M210/ade6-M216 ura4-D18/ura4-D18 his3.Δ1/his3.Δ1 leu1::pCAD1-CPR/leu1::pCAD1-UGT1A6/pREP1-CYP2C9  | CPR, UGT1A6, CYP2C9  | This study |
| 57 | SAN206 | SAN106 | h+/h- ade6-M210/ade6-M216 ura4-D18/ura4-D18 his3.Δ1/his3.Δ1 leu1::pCAD1-CPR/leu1::pCAD1-UGT1A7/pREP1-CYP2C9  | CPR, UGT1A7, CYP2C9  | This study |
| 58 | SAN207 | SAN107 | h+/h- ade6-M210/ade6-M216 ura4-D18/ura4-D18 his3.Δ1/his3.Δ1 leu1::pCAD1-CPR/leu1::pCAD1-UGT1A8/pREP1-CYP2C9  | CPR, UGT1A8, CYP2C9  | This study |
| 59 | SAN208 | SAN108 | h+/h- ade6-M210/ade6-M216 ura4-D18/ura4-D18 his3.Δ1/his3.Δ1 leu1::pCAD1-CPR/leu1::pCAD1-UGT1A9/pREP1-CYP2C9  | CPR, UGT1A9, CYP2C9  | This study |
| 60 | SAN209 | SAN109 | h+/h- ade6-M210/ade6-M216 ura4-D18/ura4-D18 his3.Δ1/his3.Δ1 leu1::pCAD1-CPR/leu1::pCAD1-UGT1A10/pREP1-CYP2C9 | CPR, UGT1A10, CYP2C9 | This study |
| 61 | SAN210 | SAN110 | h+/h- ade6-M210/ade6-M216 ura4-D18/ura4-D18 his3.Δ1/his3.Δ1 leu1::pCAD1-CPR/leu1::pCAD1-UGT2A1/pREP1-CYP2C9  | CPR, UGT2A1, CYP2C9  | This study |
| 62 | SAN211 | SAN111 | h+/h- ade6-M210/ade6-M216 ura4-D18/ura4-D18 his3.Δ1/his3.Δ1 leu1::pCAD1-CPR/leu1::pCAD1-UGT2A2/pREP1-CYP2C9  | CPR, UGT2A2, CYP2C9  | This study |
| 63 | SAN212 | SAN112 | h+/h- ade6-M210/ade6-M216 ura4-D18/ura4-D18 his3.Δ1/his3.Δ1 leu1::pCAD1-CPR/leu1::pCAD1-UGT2A3/pREP1-CYP2C9  | CPR, UGT2A3, CYP2C9  | This study |
| 64 | SAN213 | SAN113 | h+/h- ade6-M210/ade6-M216 ura4-D18/ura4-D18 his3.Δ1/his3.Δ1 leu1::pCAD1-CPR/leu1::pCAD1-UGT2B4/pREP1-CYP2C9  | CPR, UGT2B4, CYP2C9  | This study |
| 65 | SAN214 | SAN114 | h+/h- ade6-M210/ade6-M216 ura4-D18/ura4-D18 his3.Δ1/his3.Δ1 leu1::pCAD1-CPR/leu1::pCAD1-UGT2B7/pREP1-CYP2C9  | CPR, UGT2B7, CYP2C9  | This study |
| 66 | SAN215 | SAN115 | h+/h- ade6-M210/ade6-M216 ura4-D18/ura4-D18 his3.Δ1/his3.Δ1 leu1::pCAD1-CPR/leu1::pCAD1-UGT2B10/pREP1-CYP2C9 | CPR, UGT2B10, CYP2C9 | This study |
| 67 | SAN216 | SAN116 | h+/h- ade6-M210/ade6-M216 ura4-D18/ura4-D18 his3.Δ1/his3.Δ1 leu1::pCAD1-CPR/leu1::pCAD1-UGT2B11/pREP1-CYP2C9 | CPR, UGT2B11, CYP2C9 | This study |
| 68 | SAN217 | SAN117 | h+/h- ade6-M210/ade6-M216 ura4-D18/ura4-D18 his3.Δ1/his3.Δ1 leu1::pCAD1-CPR/leu1::pCAD1-UGT2B15/pREP1-CYP2C9 | CPR, UGT2B15, CYP2C9 | This study |
| 69 | SAN218 | SAN118 | h+/h- ade6-M210/ade6-M216 ura4-D18/ura4-D18 his3.Δ1/his3.Δ1 leu1::pCAD1-CPR/leu1::pCAD1-UGT2B17/pREP1-CYP2C9 | CPR, UGT2B17, CYP2C9 | This study |
| 70 | SAN219 | SAN119 | h+/h- ade6-M210/ade6-M216 ura4-D18/ura4-D18 his3.Δ1/his3.Δ1 leu1::pCAD1-CPR/leu1::pCAD1-UGT2B28/pREP1-CYP2C9 | CPR, UGT2B28, CYP2C9 | This study |

| Diploids with CYP2D6 |        |        |                                                                                                              |                      |            |
|----------------------|--------|--------|--------------------------------------------------------------------------------------------------------------|----------------------|------------|
| 71                   | SAN300 | SAN100 | h+/h- ade6-M210/ade6-M216 ura4-D18/ura4-D18 his3.Δ1/his3.Δ1 leu1::pCAD1-CPR/leu1::pCAD1/pREP1-CYP2D6         | CPR, CYP2D6          | This study |
| 72                   | SAN301 | SAN101 | h+/h- ade6-M210/ade6-M216 ura4-D18/ura4-D18 his3.Δ1/his3.Δ1 leu1::pCAD1-CPR/leu1::pCAD1-UGT1A1/pREP1-CYP2D6  | CPR, UGT1A1, CYP2D6  | This study |
| 73                   | SAN302 | SAN102 | h+/h- ade6-M210/ade6-M216 ura4-D18/ura4-D18 his3.Δ1/his3.Δ1 leu1::pCAD1-CPR/leu1::pCAD1-UGT1A3/pREP1-CYP2D6  | CPR, UGT1A3, CYP2D6  | This study |
| 74                   | SAN303 | SAN103 | h+/h- ade6-M210/ade6-M216 ura4-D18/ura4-D18 his3.Δ1/his3.Δ1 leu1::pCAD1-CPR/leu1::pCAD1-UGT1A4/pREP1-CYP2D6  | CPR, UGT1A4, CYP2D6  | This study |
| 75                   | SAN304 | SAN104 | h+/h- ade6-M210/ade6-M216 ura4-D18/ura4-D18 his3.Δ1/his3.Δ1 leu1::pCAD1-CPR/leu1::pCAD1-UGT1A5/pREP1-CYP2D6  | CPR, UGT1A5, CYP2D6  | This study |
| 76                   | SAN305 | SAN105 | h+/h- ade6-M210/ade6-M216 ura4-D18/ura4-D18 his3.Δ1/his3.Δ1 leu1::pCAD1-CPR/leu1::pCAD1-UGT1A6/pREP1-CYP2D6  | CPR, UGT1A6, CYP2D6  | This study |
| 77                   | SAN306 | SAN106 | h+/h- ade6-M210/ade6-M216 ura4-D18/ura4-D18 his3.Δ1/his3.Δ1 leu1::pCAD1-CPR/leu1::pCAD1-UGT1A7/pREP1-CYP2D6  | CPR, UGT1A7, CYP2D6  | This study |
| 78                   | SAN307 | SAN107 | h+/h- ade6-M210/ade6-M216 ura4-D18/ura4-D18 his3.Δ1/his3.Δ1 leu1::pCAD1-CPR/leu1::pCAD1-UGT1A8/pREP1-CYP2D6  | CPR, UGT1A8, CYP2D6  | This study |
| 79                   | SAN308 | SAN108 | h+/h- ade6-M210/ade6-M216 ura4-D18/ura4-D18 his3.Δ1/his3.Δ1 leu1::pCAD1-CPR/leu1::pCAD1-UGT1A9/pREP1-CYP2D6  | CPR, UGT1A9, CYP2D6  | This study |
| 80                   | SAN309 | SAN109 | h+/h- ade6-M210/ade6-M216 ura4-D18/ura4-D18 his3.Δ1/his3.Δ1 leu1::pCAD1-CPR/leu1::pCAD1-UGT1A10/pREP1-CYP2D6 | CPR, UGT1A10, CYP2D6 | This study |
| 81                   | SAN310 | SAN110 | h+/h- ade6-M210/ade6-M216 ura4-D18/ura4-D18 his3.Δ1/his3.Δ1 leu1::pCAD1-CPR/leu1::pCAD1-UGT2A1/pREP1-CYP2D6  | CPR, UGT2A1, CYP2D6  | This study |
| 82                   | SAN311 | SAN111 | h+/h- ade6-M210/ade6-M216 ura4-D18/ura4-D18 his3.Δ1/his3.Δ1 leu1::pCAD1-CPR/leu1::pCAD1-UGT2A2/pREP1-CYP2D6  | CPR, UGT2A2, CYP2D6  | This study |
| 83                   | SAN312 | SAN112 | h+/h- ade6-M210/ade6-M216 ura4-D18/ura4-D18 his3.Δ1/his3.Δ1 leu1::pCAD1-CPR/leu1::pCAD1-UGT2A3/pREP1-CYP2D6  | CPR, UGT2A3, CYP2D6  | This study |
| 84                   | SAN313 | SAN113 | h+/h- ade6-M210/ade6-M216 ura4-D18/ura4-D18 his3.Δ1/his3.Δ1 leu1::pCAD1-CPR/leu1::pCAD1-UGT2B4/pREP1-CYP2D6  | CPR, UGT2B4, CYP2D6  | This study |
| 85                   | SAN314 | SAN114 | h+/h- ade6-M210/ade6-M216 ura4-D18/ura4-D18 his3.Δ1/his3.Δ1 leu1::pCAD1-CPR/leu1::pCAD1-UGT2B7/pREP1-CYP2D6  | CPR, UGT2B7, CYP2D6  | This study |
| 86                   | SAN315 | SAN115 | h+/h- ade6-M210/ade6-M216 ura4-D18/ura4-D18 his3.Δ1/his3.Δ1 leu1::pCAD1-CPR/leu1::pCAD1-UGT2B10/pREP1-CYP2D6 | CPR, UGT2B10, CYP2D6 | This study |

|                             |        |        |                                                                                                              |                      |            |
|-----------------------------|--------|--------|--------------------------------------------------------------------------------------------------------------|----------------------|------------|
| 87                          | SAN316 | SAN116 | h+/h- ade6-M210/ade6-M216 ura4-D18/ura4-D18 his3.Δ1/his3.Δ1 leu1::pCAD1-CPR/leu1::pCAD1-UGT2B11/pREP1-CYP2D6 | CPR, UGT2B11, CYP2D6 | This study |
| 88                          | SAN317 | SAN117 | h+/h- ade6-M210/ade6-M216 ura4-D18/ura4-D18 his3.Δ1/his3.Δ1 leu1::pCAD1-CPR/leu1::pCAD1-UGT2B15/pREP1-CYP2D6 | CPR, UGT2B15, CYP2D6 | This study |
| 89                          | SAN318 | SAN118 | h+/h- ade6-M210/ade6-M216 ura4-D18/ura4-D18 his3.Δ1/his3.Δ1 leu1::pCAD1-CPR/leu1::pCAD1-UGT2B17/pREP1-CYP2D6 | CPR, UGT2B17, CYP2D6 | This study |
| 90                          | SAN319 | SAN119 | h+/h- ade6-M210/ade6-M216 ura4-D18/ura4-D18 his3.Δ1/his3.Δ1 leu1::pCAD1-CPR/leu1::pCAD1-UGT2B28/pREP1-CYP2D6 | CPR, UGT2B28, CYP2D6 | This study |
| <b>Diploids with CYP4Z1</b> |        |        |                                                                                                              |                      |            |
| 91                          | SAN500 | SAN100 | h+/h- ade6-M210/ade6-M216 ura4-D18/ura4-D18 his3.Δ1/his3.Δ1 leu1::pCAD1-CPR/leu1::pCAD1/pREP1-CYP4Z1         | CPR, CYP4Z1          | This study |
| 92                          | SAN501 | SAN101 | h+/h- ade6-M210/ade6-M216 ura4-D18/ura4-D18 his3.Δ1/his3.Δ1 leu1::pCAD1-CPR/leu1::pCAD1-UGT1A1/pREP1-CYP4Z1  | CPR, UGT1A1, CYP4Z1  | This study |
| 93                          | SAN502 | SAN102 | h+/h- ade6-M210/ade6-M216 ura4-D18/ura4-D18 his3.Δ1/his3.Δ1 leu1::pCAD1-CPR/leu1::pCAD1-UGT1A3/pREP1-CYP4Z1  | CPR, UGT1A3, CYP4Z1  | This study |
| 94                          | SAN503 | SAN103 | h+/h- ade6-M210/ade6-M216 ura4-D18/ura4-D18 his3.Δ1/his3.Δ1 leu1::pCAD1-CPR/leu1::pCAD1-UGT1A4/pREP1-CYP4Z1  | CPR, UGT1A4, CYP4Z1  | This study |
| 95                          | SAN504 | SAN104 | h+/h- ade6-M210/ade6-M216 ura4-D18/ura4-D18 his3.Δ1/his3.Δ1 leu1::pCAD1-CPR/leu1::pCAD1-UGT1A5/pREP1-CYP4Z1  | CPR, UGT1A5, CYP4Z1  | This study |
| 96                          | SAN505 | SAN105 | h+/h- ade6-M210/ade6-M216 ura4-D18/ura4-D18 his3.Δ1/his3.Δ1 leu1::pCAD1-CPR/leu1::pCAD1-UGT1A6/pREP1-CYP4Z1  | CPR, UGT1A6, CYP4Z1  | This study |
| 97                          | SAN506 | SAN106 | h+/h- ade6-M210/ade6-M216 ura4-D18/ura4-D18 his3.Δ1/his3.Δ1 leu1::pCAD1-CPR/leu1::pCAD1-UGT1A7/pREP1-CYP4Z1  | CPR, UGT1A7, CYP4Z1  | This study |
| 98                          | SAN507 | SAN107 | h+/h- ade6-M210/ade6-M216 ura4-D18/ura4-D18 his3.Δ1/his3.Δ1 leu1::pCAD1-CPR/leu1::pCAD1-UGT1A8/pREP1-CYP4Z1  | CPR, UGT1A8, CYP4Z1  | This study |
| 99                          | SAN508 | SAN108 | h+/h- ade6-M210/ade6-M216 ura4-D18/ura4-D18 his3.Δ1/his3.Δ1 leu1::pCAD1-CPR/leu1::pCAD1-UGT1A9/pREP1-CYP4Z1  | CPR, UGT1A9, CYP4Z1  | This study |
| 100                         | SAN509 | SAN109 | h+/h- ade6-M210/ade6-M216 ura4-D18/ura4-D18 his3.Δ1/his3.Δ1 leu1::pCAD1-CPR/leu1::pCAD1UGT1A10/pREP1-CYP4Z1  | CPR, UGT1A10, CYP4Z1 | This study |
| 101                         | SAN510 | SAN110 | h+/h- ade6-M210/ade6-M216 ura4-D18/ura4-D18 his3.Δ1/his3.Δ1 leu1::pCAD1-CPR/leu1::pCAD1-UGT2A1/pREP1-CYP4Z1  | CPR, UGT2A1, CYP4Z1  | This study |
| 102                         | SAN511 | SAN111 | h+/h- ade6-M210/ade6-M216 ura4-D18/ura4-D18 his3.Δ1/his3.Δ1 leu1::pCAD1-CPR/leu1::pCAD1-UGT2A2/pREP1-CYP4Z1  | CPR, UGT2A2, CYP4Z1  | This study |

|     |        |        |                                                                                                              |                      |            |
|-----|--------|--------|--------------------------------------------------------------------------------------------------------------|----------------------|------------|
| 103 | SAN512 | SAN112 | h+/h- ade6-M210/ade6-M216 ura4-D18/ura4-D18 his3.Δ1/his3.Δ1 leu1::pCAD1-CPR/leu1::pCAD1-UGT2A3/pREP1-CYP4Z1  | CPR, UGT2A3, CYP4Z1  | This study |
| 104 | SAN513 | SAN113 | h+/h- ade6-M210/ade6-M216 ura4-D18/ura4-D18 his3.Δ1/his3.Δ1 leu1::pCAD1-CPR/leu1::pCAD1-UGT2B4/pREP1-CYP4Z1  | CPR, UGT2B4, CYP4Z1  | This study |
| 105 | SAN514 | SAN114 | h+/h- ade6-M210/ade6-M216 ura4-D18/ura4-D18 his3.Δ1/his3.Δ1 leu1::pCAD1-CPR/leu1::pCAD1-UGT2B7/pREP1-CYP4Z1  | CPR, UGT2B7, CYP4Z1  | This study |
| 106 | SAN515 | SAN115 | h+/h- ade6-M210/ade6-M216 ura4-D18/ura4-D18 his3.Δ1/his3.Δ1 leu1::pCAD1-CPR/leu1::pCAD1-UGT2B10/pREP1-CYP4Z1 | CPR, UGT2B10, CYP4Z1 | This study |
| 107 | SAN516 | SAN116 | h+/h- ade6-M210/ade6-M216 ura4-D18/ura4-D18 his3.Δ1/his3.Δ1 leu1::pCAD1-CPR/leu1::pCAD1-UGT2B11/pREP1-CYP4Z1 | CPR, UGT2B11, CYP4Z1 | This study |
| 108 | SAN517 | SAN117 | h+/h- ade6-M210/ade6-M216 ura4-D18/ura4-D18 his3.Δ1/his3.Δ1 leu1::pCAD1-CPR/leu1::pCAD1-UGT2B15/pREP1-CYP4Z1 | CPR, UGT2B15 CYP4Z1  | This study |
| 109 | SAN518 | SAN118 | h+/h- ade6-M210/ade6-M216 ura4-D18/ura4-D18 his3.Δ1/his3.Δ1 leu1::pCAD1-CPR/leu1::pCAD1-UGT2B17/pREP1-CYP4Z1 | CPR, UGT2B17, CYP4Z1 | This study |
| 110 | SAN519 | SAN119 | h+/h- ade6-M210/ade6-M216 ura4-D18/ura4-D18 his3.Δ1/his3.Δ1 leu1::pCAD1-CPR/leu1::pCAD1-UGT2B28/pREP1-CYP4Z1 | CPR, UGT2B28, CYP4Z1 | This study |
